# Supplementary material for: PGC‐1α affects aging‐related changes in muscle and motor function by modulating specific exercise‐mediated changes in old mice
Source: PubMed Central journal article supplement (PMC5770876; doi:10.1111/acel.12697), 2017-10-25
Supplement: ACEL-17-na-s001.pdf [file ACEL-17-na-s001.pdf]

## **Supplemental Tables and Figures**

**Table S1: qPCR primer sequences**

| <b>Gene name</b>                 | <b>forward sequence</b>   | <b>reverse sequence</b>  |
|----------------------------------|---------------------------|--------------------------|
| <b><math>\beta</math>globin</b>  | GAAGCGATTCTAGGGAGCAG      | GGAGCAGCGATTCTGAGTAGA    |
| <b>36B4</b>                      | ACTGGTCTAGGACCCGAGAAG     | TCAATGGTGCCTCTGGAGATT    |
| <b>ATP6</b>                      | AGTATGAGCTGGAGCCGTAATTACA | TGGAAGGAAGTGGGCAAGTG     |
| <b>COX1</b>                      | TGCTAGCCGCAGGCATTACT      | GCGGGATCAAAGAAAGTTGTG    |
| <b>COX5a</b>                     | CGCCGCTGTCTGTTCCAT        | AAACTCCTCATCTGTCTCGTGTGA |
| <b>COX5b</b>                     | CTTCAGGCACCAAGGAAGAC      | TTCACAGATGCAGCCCACTA     |
| <b>ERR<math>\alpha</math></b>    | CGGTGTGGCATCCTGTGA        | CTCCCCTGGATGGTCTCTT      |
| <b>ND1</b>                       | TCTGCCAGCCTGACCCATA       | GGGCCCGTTTGTCTTCTG       |
| <b>NRF1</b>                      | TCCCCCGAGGACACTTCTT       | ATCAGCTGCCGTGGAGTTG      |
| <b>PGC-1<math>\alpha</math></b>  | AGCCGTGACCACTGACAACGAG    | GCTGCATGGTCTGAGTGCTAAG   |
| <b>SDH</b>                       | GCTGGTGTGGATGTCTACTAAGG   | CCCACCCATGTTGTAATGCA     |
| <b>TBP</b>                       | ATATAATCCAAGCGATTTCG      | GTCCGTGGCTCTCTTATTCTC    |
| <b>MuSK</b>                      | ATCCAACCCCATGTACCAG       | CCTTAAGCATCTTCACGGCC     |
| <b>AchEst</b>                    | CGGAGGCTCTCATCAATACTGG    | GGGACCCCGTAAACCAGAAAG    |
| <b>Rapsyn</b>                    | AGACAGCCTTCCCTCGGTA       | CTTCAGCTAAGTCTGGGCT      |
| <b>Agri</b>                      | ATGGCAAGACACCCTCACTG      | TCCTTGCAGTCTCCCCAAAC     |
| <b>ErbB2</b>                     | AAGAGGTCACAGCTGAGGAC      | AAAATGCCAGGCTCCCCAAG     |
| <b>AChR<math>\beta</math></b>    | CATCATCGCTCACCCAC         | ACGGTCCACAACCATGGC       |
| <b>AChR<math>\epsilon</math></b> | TGTTTGAGGGTCAGAGGCAT      | AGTTCCTCTCCAGTGGCTTC     |
| <b>AChR<math>\alpha</math></b>   | AGTCCAATAACGCCGCTGAG      | TTTCCTAGCGATGGCTATGG     |
| <b>AChR<math>\delta</math></b>   | ACAAAGTGGATGTGCCCCTA      | TCTCTGGTAGCCACACCATG     |
| <b>AChR<math>\gamma</math></b>   | GACCAACCTCATCTCCCTGA      | GAGAGCCACCTCGAAGACAC     |
| <b>Utrophin</b>                  | GAGGCTCGCTTCTACATGCT      | TGATGACACCATCGCCAGAC     |

**Table S2: Antibody information**

| Primary antibodies |         |                     |          | Secondary antibodies |                |          |
|--------------------|---------|---------------------|----------|----------------------|----------------|----------|
| Product#           | Company | Labelling           | Dilution | Product#             | Labelling      | Dilution |
| BA-F8              | DSHB    | m IgG b2 MHC type 1 | 1:25     | A-21242              | AF647 IgG GaM  | 1:250    |
| SC-71              | DSHB    | m IgG1 MHC type 2a  | 1:200    | A-21124              | AF568 IgG1 GaM | 1:100    |
| BF-F3              | DSHB    | m IgM MHC type 2b   | 1:100    | A-21042              | AF488 IgM GaM  | 1:400    |
| L9393              | Sigma   | r IgM Laminin       | 1:5000   | A-11008              | AF488 IgG GaR  | 1:500    |

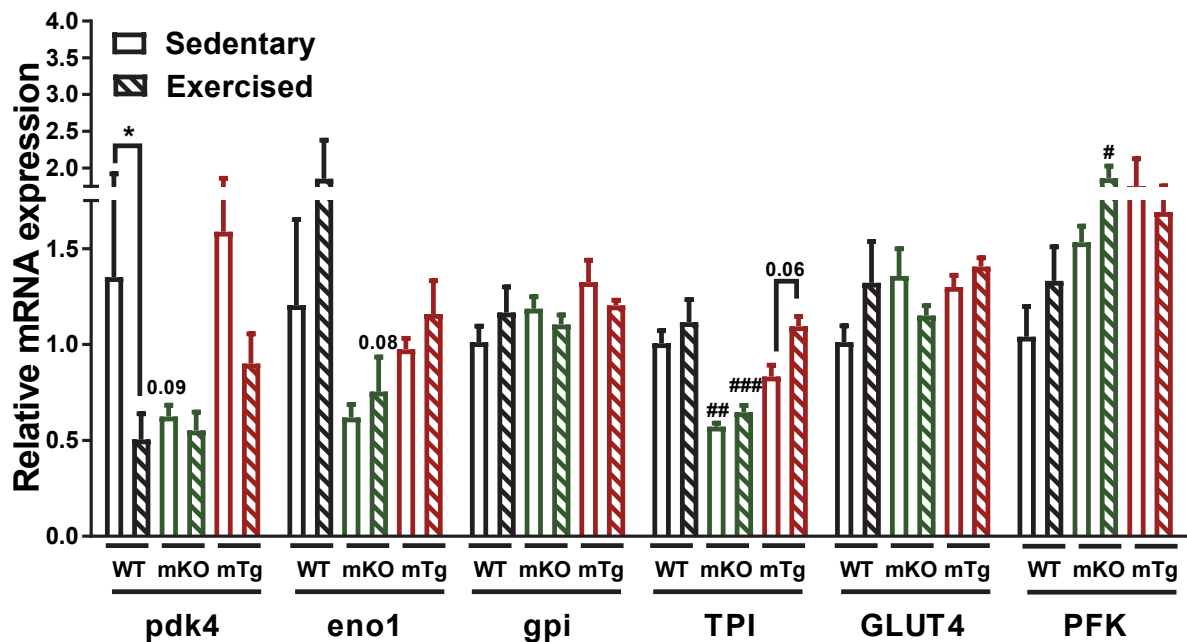

**Fig. S1 : Exercise-dependent regulation of glycolysis genes.** Relative quadriceps mRNA levels of genes involved in lactate regulation and glycolysis (n=4-6). Values are mean  $\pm$  SEM. \*P < 0.05; \*\*P < 0.01; \*\*\*; P < 0.001; \*\*\*\*p<0.0001 indicate statistically significant differences between young and old animals of the same genotype, # p<0.01; ## p<0.01; ### p<0.01; #### p<0.001 indicate statistically significant differences between genotypes of age-matched animals.

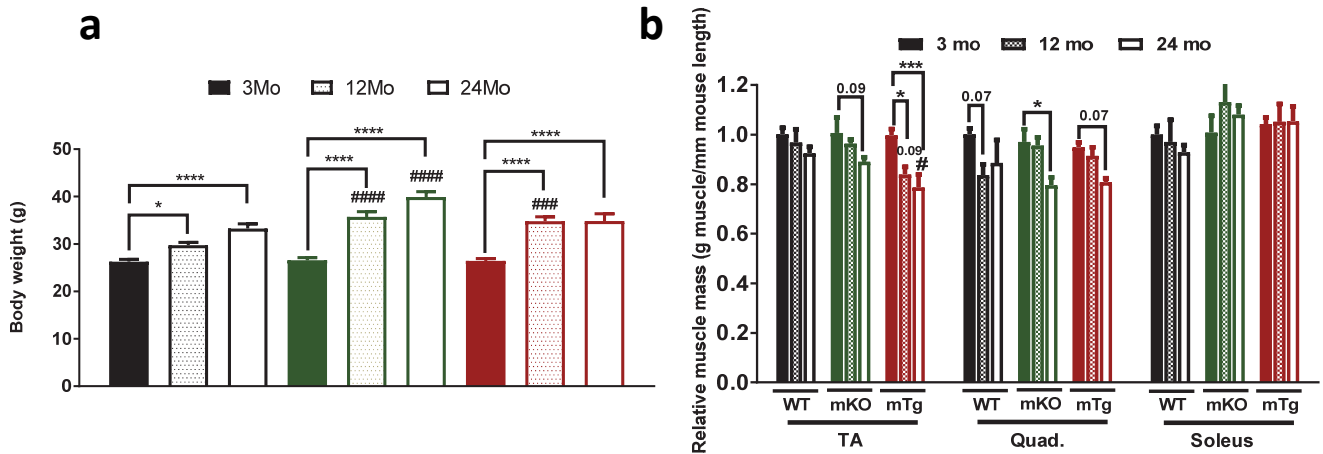

**Fig. S2 : Body weight (n=10-12) (a) and absolute mass of isolated muscles (n=5-6) (b)** Values are mean  $\pm$  SEM. \*P < 0.05; \*\*P < 0.01; \*\*\*; P < 0.001; \*\*\*\*p<0.0001 indicate statistically significant differences between young and old animals of the same genotype, # p<0.01; ## p<0.01; ### p<0.01; #### p<0.001 indicate statistically significant differences between genotypes of age-matched animals.

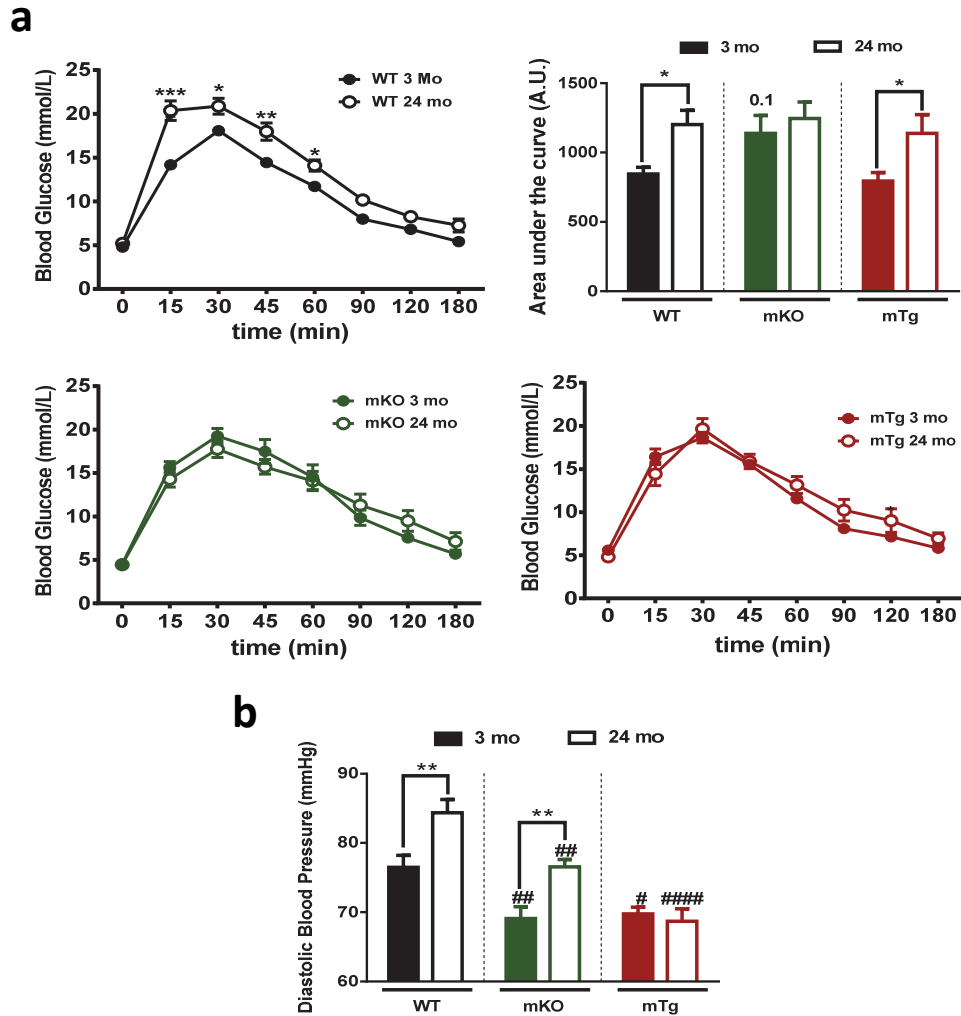

**Fig. S3 : PGC-1 $\alpha$  improves systemic aging (a)** Glucose tolerance test curves and area under the curves (n=10) **(b)** Diastolic blood pressure (n=10). Values are mean  $\pm$  SEM. \*P < 0.05; \*\*P < 0.01; \*\*\*; P < 0.001; \*\*\*\*p<0.0001 indicate statistically significant differences between young and old animals of the same genotype, # p<0.01; ## p<0.01; ### p<0.01; #### p<0.001 indicate statistically significant differences between genotypes of age-matched animals.

**a**

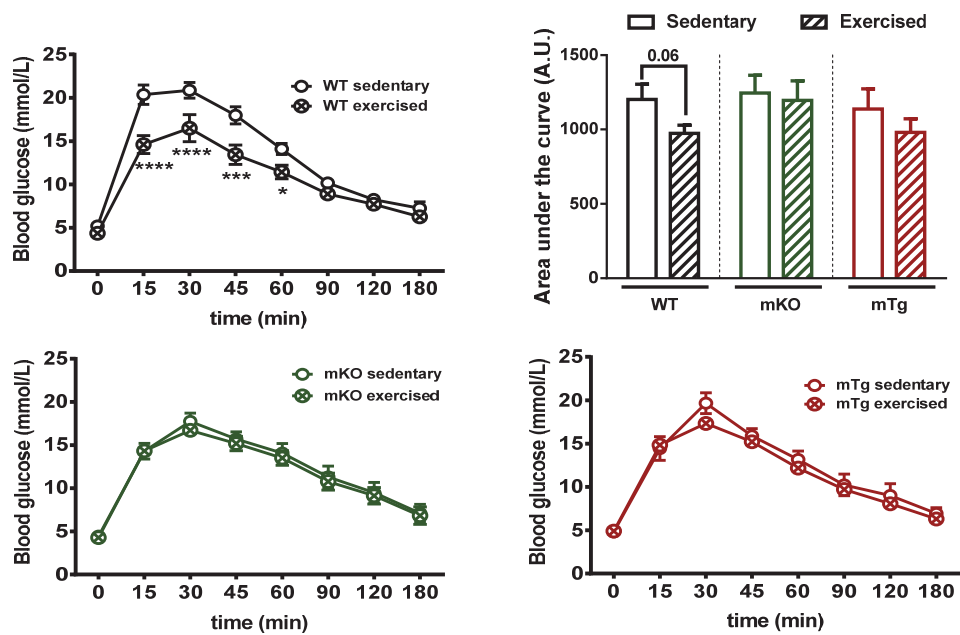

**b**

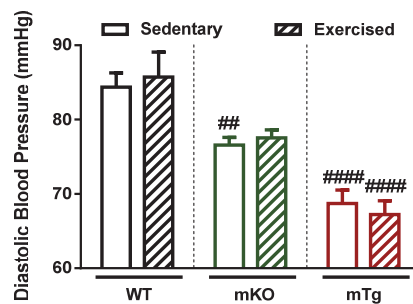

**Fig. S4 : Exercise and PGC-1 $\alpha$  modulation impacts on systemic aging (a)** Glucose tolerance test curves and area under the curves (n=8-10) **(b)** Diastolic blood pressure (n=10-12) Values are mean  $\pm$  SEM. \*P < 0.05; \*\*P < 0.01; \*\*\*; P < 0.001; \*\*\*\*p<0.0001 indicate statistically significant differences between sedentary and exercised animals of the same genotype, # p<0.01; ## p<0.01; ### p<0.01; #### p<0.001 indicate statistically significant differences between genotypes for sedentary and exercised animals.
